# Supplementary material for: Prompting peroxidase-like activity of gold nanorod composites by localized surface plasmon resonance for fast colorimetric detection of prostate specific antigen
Source: Royal Society of Chemistry journal article supplement (doi:10.1039/c8an00664d), 2018-01-01
Supplement: c8an00664d1.pdf [file c8an00664d1.pdf]

**Prompting peroxidase-like activity of gold nanorod composite by  
localized surface plasmon resonance for fast colorimetric detection of  
prostate specific antigen**

Fang Tan,<sup>a</sup> Yan Yang,<sup>a</sup> Xiaoxue Xie,<sup>a</sup> Linqian Wang,<sup>b</sup> Keqin Deng,<sup>a</sup> Xiaodong Xia,<sup>a</sup>  
Xiumei Yang,<sup>a</sup> Haowen Huang<sup>a\*</sup>

*a Key Laboratory of Theoretical Organic Chemistry and Function Molecule, Ministry  
of Education, Hunan Provincial Key Laboratory of Controllable Preparation and  
Functional Application of Fine Polymers, School of Chemistry and Chemical  
Engineering, Hunan University of Science and Technology, Xiangtan, China, 411201.*

*b Department of Laboratory, Hunan Provincial Tumor Hospital, the Affiliated  
Tumor Hospital of Xiangya Medical School of Central South University, Changsha,  
Hunan Province, China*

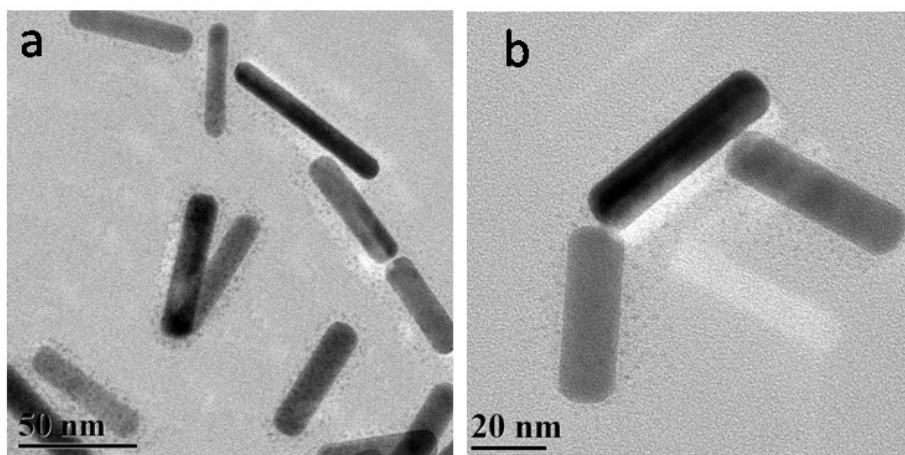

**Fig. S1.** TEM images of AuNC/GNRs heterostructure.

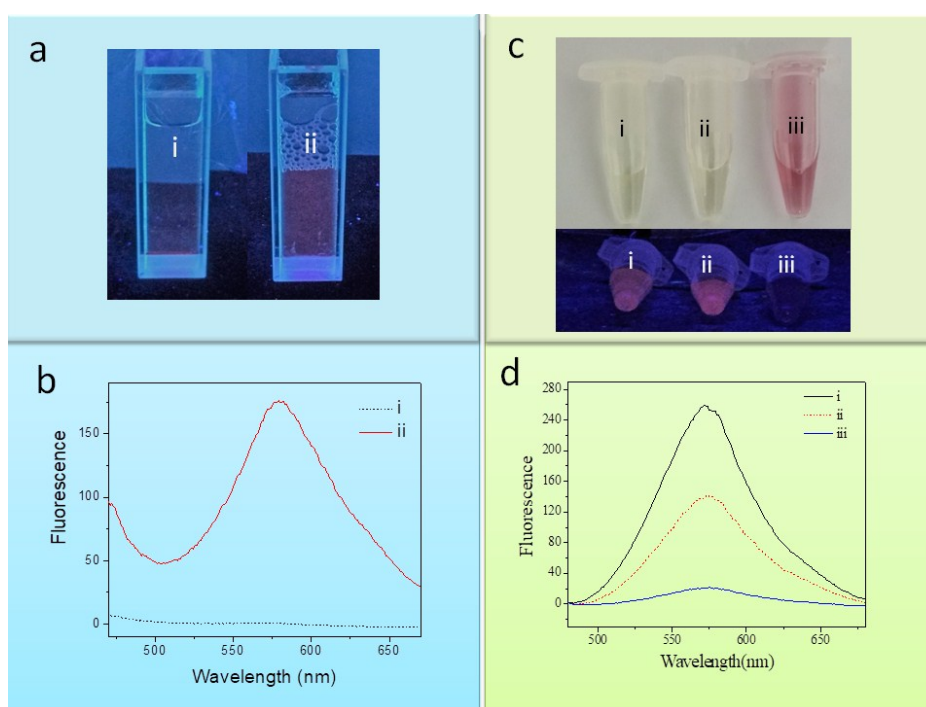

**Fig. S2.** (a) Photograph of AuNC/GNRs sediment (i) and suspension (ii) under UV irradiation ( $\lambda = 365$  nm) and their corresponding fluorescent spectra (b). (c) AuNCs simply mixed with GNRs without activated reagents (EDC and NHS), (i) AuNCs, (ii) supernate by centrifugation from the simple mixture of AuNCs and GNRs, (iii) GNRs obtained from the centrifugation of the mixture of AuNCs and GNRs, (d) fluorescent spectra corresponding to (c).

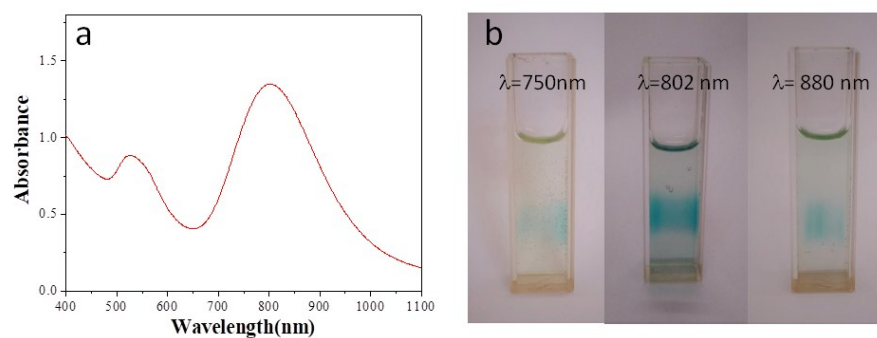

**Fig. S3.** (a) LSPR spectrum of AuNC/GNRs heterostructure. (b) Photographs of blue ribbon appeared in cuvettes as the monochromatic light spot ( $\lambda=750$ , 802, 880 nm) pass through the solution containing TMB,  $\text{H}_2\text{O}_2$  and AuNC/GNRs heterostructure after 10 min.
